# Supplementary material for: Unveiling the effect of 11-MUA coating on biocompatibility and catalytic activity of a gold-core cerium oxide-shell-based nanozyme
Source: Royal Society of Chemistry journal article supplement (doi:10.1039/c9ra05547a), 2019-01-01
Supplement: c9ra05547a1.pdf [file c9ra05547a1.pdf]

## SUPPORTING INFORMATION

### Unveiling the effect of 11-MUA coating on biocompatibility and catalytic activity of Gold-core Cerium oxide-shell-based nanozyme

Vidhi Jain,<sup>a</sup> Stuti Bhagat,<sup>a</sup> Mandeep Singh,<sup>b</sup> Vipul Bansal,<sup>b</sup> and Sanjay Singh<sup>a\*</sup>

<sup>a</sup>Division of Biological and Life Sciences, School of Arts and Sciences, Ahmedabad University, Central Campus, Ahmedabad-380009, Gujarat, India.

<sup>b</sup> Ian Potter NanoBioSensing Facility, NanoBiotechnology Research Laboratory (NBRL), School of Science, RMIT University, GPO Box 2476, Melbourne, VIC, 3000, Australia

\*Corresponding Author address: Division of Biological and Life Sciences, School of Arts and Sciences, Ahmedabad University, Central Campus, Ahmedabad-380009, Gujarat, India.

Email: [sanjay.singh@ahduni.edu.in](mailto:sanjay.singh@ahduni.edu.in)

## **Experimental Methods:**

### **XRD analysis of CTAB coated CSNPs and 11-MUA coated AuNPs:**

X-ray diffraction (XRD) was done using Bruker D4 Endeavor diffractometer equipped with Cu-K $\alpha$  radiation source and operated at 40 kV and 35 mA. The aqueous samples were drop casted on glass slide and after complete dryness, the samples were scanned for XRD pattern.

### **Temperature and pH depended peroxidase-like activity:**

In a typical experiment, 1 mM TMB was used as chromogenic substrate to measure peroxidase-like activity of the different concentration of CTAB coated CSNPs, CTAB coated CeO<sub>2</sub>NPs, CTAB coated AuNPs and 11-MUA coated AuNPs. Addition of H<sub>2</sub>O<sub>2</sub> (2 M) converted reduced TMB to oxidized TMB product which was blue coloured product. The peroxidase-like activity was buffered with citrate buffer at pH- 4.0 and initiated at 37 °C. The total reaction volume was 500  $\mu$ L. The effect of temperature and pH on peroxidase-like activity NPs were carried using 25  $\mu$ g/mL of CTAB coated CSNPs and 11-MUA coated AuNPs , 1 mM TMB and 2 M H<sub>2</sub>O<sub>2</sub> in 0.1 M citrate buffer (pH-4.0). For pH dependent study, CTAB coated CSNPs and 11-MUA coated AuNPs were incubated overnight at different pH (range 2–12) and the temperature was maintained at 37° C. For temperature studies, the reaction was carried a wide range of temperature (20–90 °C) at pH 4.0. The evolution of absorbance of oxidised TMB at 652 nm was followed for about 20 minutes.

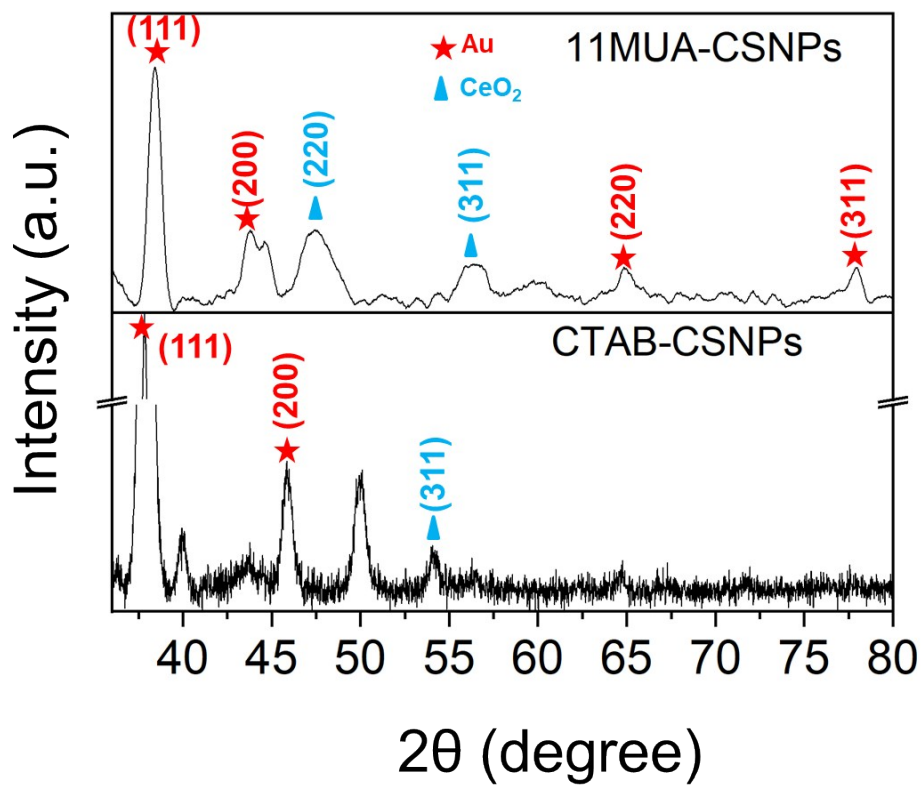

**Figure S1:** XRD analysis of CTAB coated CSNPs and 11-MUA coated AuNPs. 2theta value for CTAB coated CSNPs for Au was 33.8 (111) and 54.2 (200) for CeO<sub>2</sub> was 45.7(311). 2 theta value for 11-MUA coated CSNPs for Au was 38.7 (111), 44.7 (200), 64.7 (220) and 76.6 (311), for CeO<sub>2</sub> 46.8 (220) and 57.5 (311).

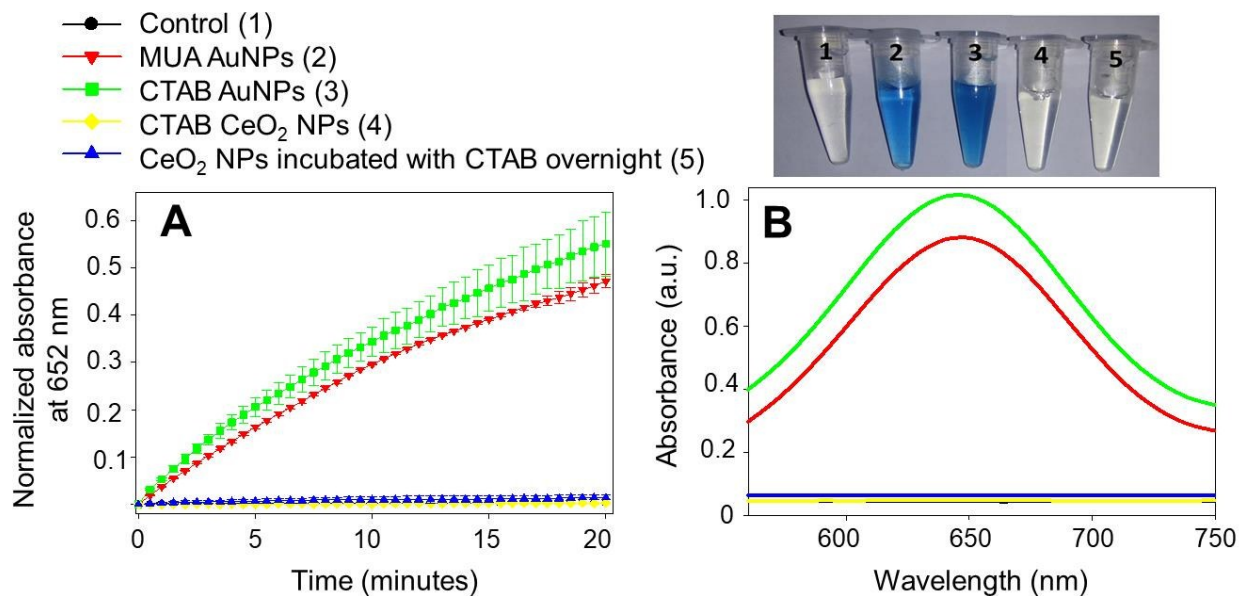

**Figure S2:** Peroxidase-like activity was measured by using UV-Vis Spectrophotometer for CTAB coated CSNPs, 11-MUA coated AuNPs and CTAB coated CeO<sub>2</sub> NPs (A). Inset tubes represent color intensity of TMB in presence of H<sub>2</sub>O<sub>2</sub>. Tube 1 contains TMB + H<sub>2</sub>O<sub>2</sub>. Tube 2 & 3 contain CTAB coated CSNPs and 11-MUA coated AuNPs, respectively. Tube 4 and 5 contain CTAB coated CeO<sub>2</sub> NPs and CeO<sub>2</sub> NPs incubated overnight with CTAB respectively. The peroxidase reaction of CTAB coated CSNPs, 11-MUA coated AuNPs and CTAB coated CeO<sub>2</sub> NPs was followed by recording the change in absorbance of oxidized TMB at 652 nm (B). Data expressed as standard deviation calculated from 3 experiments.

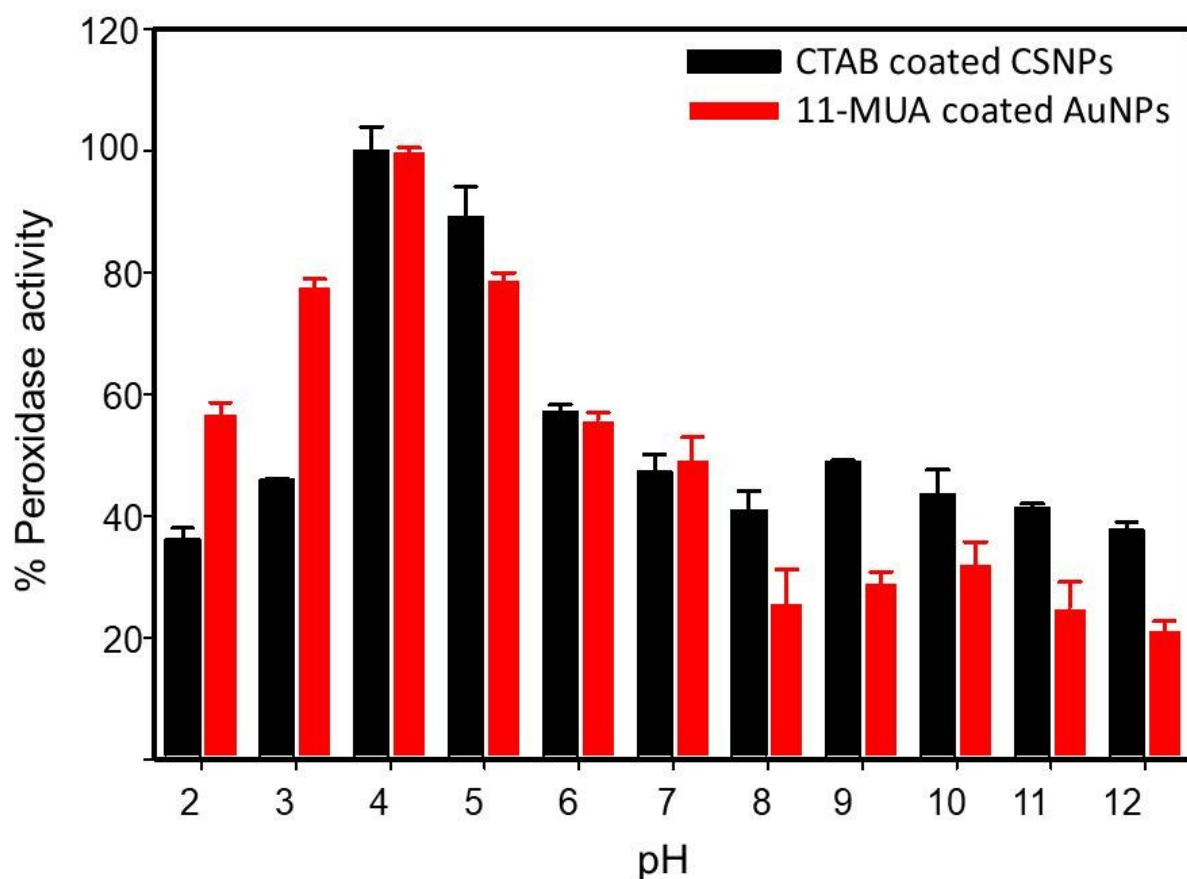

**Figure S3:** Peroxidase-like activity at different pH was measured by using UV-Vis Spectrophotometer for CTAB coated CSNPs and 11-MUA coated AuNPs. The changes in enzyme mimetic activity were followed by recording absorbance of TMB at 652 nm. Rest of the reaction conditions were kept same. The highest activity was considered as 100%. Data expressed as standard deviation calculated from 3 independent experiments.

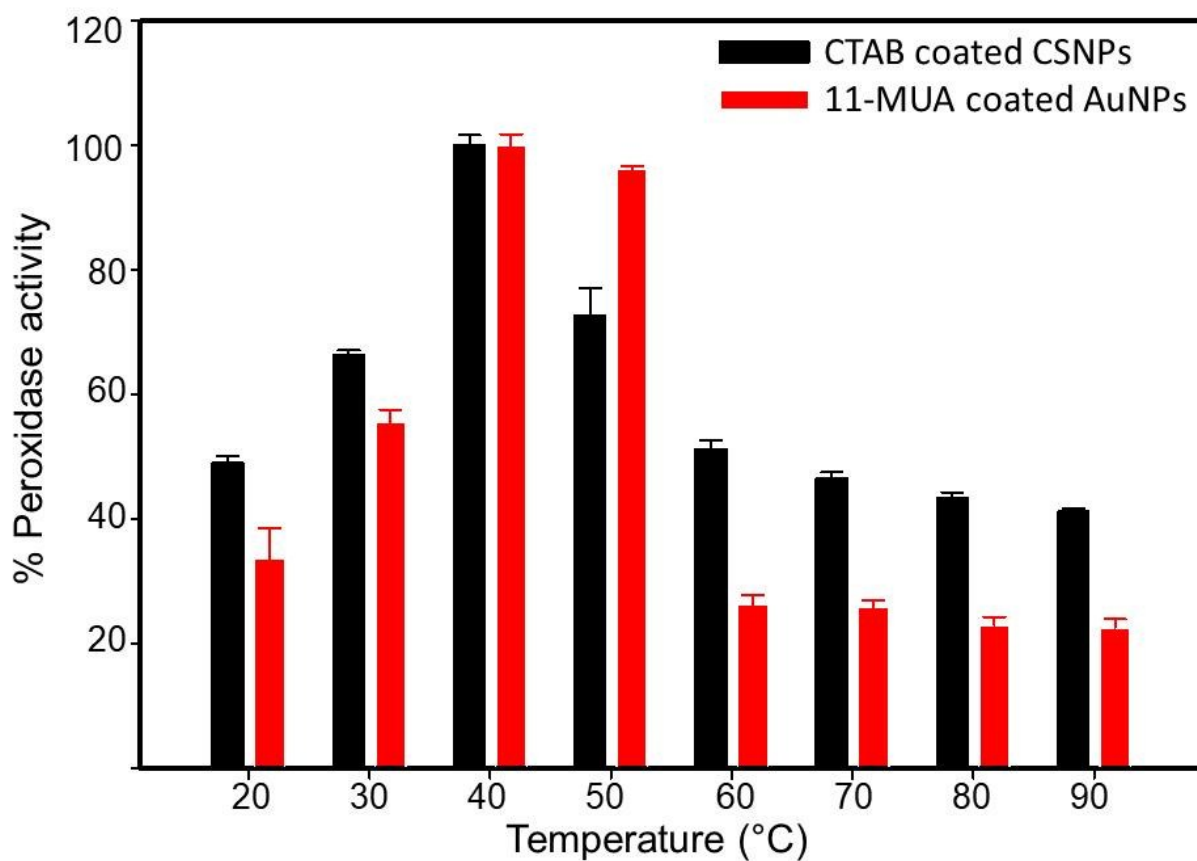

**Figure S4:** Peroxidase-like activity at different temperatures was measured by using UV-Vis Spectrophotometer for CTAB coated CSNPs and 11-MUA coated AuNPs. The changes in enzyme mimetic activity were followed by recording absorbance of TMB at 652 nm. The highest activity was considered as 100%. Rest of the reaction conditions were kept same. Data expressed as standard deviation calculated from 3 independent experiments.
